# Supplementary material
Source: publisher figshare collection journal article supplement (https://tandf.figshare.com/articles/dataset/_/1632167)
Supplement: Supplementary file 1 [file 2619559]

## SUPPLEMENTARY MATERIAL

### Two new Compounds, **Deacetylisowortmins** A and B, isolated from an Endophytic Fungus, *Talaromyces wortmannii* LGT-4

Guang-Chao Fu<sup>a</sup>, Zhong-Duo Yang<sup>\*, a, b</sup>, Shuang-Yan Zhou<sup>c</sup>, Hai-Tao Yu<sup>d</sup>, Fei Zhang<sup>a</sup>, Xiao-Jun Yao<sup>c,\*</sup>

<sup>a</sup>*School of Life Science and Engineering, Lanzhou University of Technology, Lanzhou 730050, PR China*

<sup>b</sup>*The Provincial Education Key Laboratory of Screening, Evaluation and Advanced Processing of Traditional Chinese Medicine and Tibetan Medicine, School of Life Science and Engineering, Lanzhou University of Technology, Lanzhou, 730050, PR China*

<sup>c</sup>*Department of Chemistry, Lanzhou University, Lanzhou, 730000, PR China*

<sup>d</sup>*Institute of Plant Protection, Gansu Academy of Agricultural Sciences, Lanzhou, 730070, PR China*

Two new compounds, **deacetylisowortmins** A (**1**) and B (**2**), were isolated from *Talaromyces wortmannii* LGT-4. Their structures were established by 1D and 2D NMR spectra, as well as comparison of the experimental and calculated electronic circular dichroism (ECD) spectra. Monoamine oxidase and acetylcholinesterase inhibitory **activities** of **1** and **2** were also evaluated.

**Keywords:** Endophytic fungus; *Talaromyces wortmannii*; **Deacetylisowortmins**; Structure elucidation; Enzyme inhibition

---

\* Corresponding authors. Tel.: +86-931-2973362; fax: +86-931-2973924. Email: yangzhongduo@126.com, xjyao@lzu.edu.cn

Contents:

- Table S1.  $^1\text{H}$  NMR data of compound **1-2** (600 M)
- Table S2.  $^{13}\text{C}$  NMR data of compound **1-2** (150 M)
- Figure S1. Key HMBC,  $1\text{H}-1\text{HCOSY}$  and NOESY correlations of **1** and **2**
- Figure S2. Calculated and experimental ECD spectra of **1** and **2**
- Figure S3. ESI MS spectrum of compound **1**
- Figure S4. HRESI MS spectrum of compound **1**
- Figure S5.  $^1\text{H}$  NMR (600 MHz,  $\text{CD}_3\text{OD}$ ) spectrum of compound **1**
- Figure S6.  $^1\text{H}$  NMR (600 MHz,  $\text{CDCl}_3$ ) spectrum of compound **1**
- Figure S7.  $^{13}\text{C}$  NMR (600 MHz,  $\text{CD}_3\text{OD}$ ) spectrum of compound **1**
- Figure S8. COSY (600 MHz,  $\text{CD}_3\text{OD}$ ) spectrum of compound **1**
- Figure S9. NOESY (600 MHz,  $\text{CD}_3\text{OD}$ ) spectrum of compound **1**
- Figure S10. NOESY (600 MHz,  $\text{CDCl}_3$ ) spectrum of compound **1**
- Figure S11. HMBC (600 MHz,  $\text{CD}_3\text{OD}$ ) spectrum of compound **1**
- Figure S12. HMQC (600 MHz,  $\text{CD}_3\text{OD}$ ) spectrum of compound **1**
- Figure S13. ESI MS spectrum of compound **2**
- Figure S14. HRESI MS spectrum of compound **2**
- Figure S15.  $^1\text{H}$  NMR (600 MHz,  $\text{CDCl}_3$ ) spectrum of compound **2**
- Figure S16.  $^{13}\text{C}$  NMR (600 MHz,  $\text{CDCl}_3$ ) spectrum of compound **2**
- Figure S17. COSY (600 MHz,  $\text{CDCl}_3$ ) spectrum of compound **2**
- Figure S18. NOESY (600 MHz,  $\text{CDCl}_3$ ) spectrum of compound **2**
- Figure S19. HMBC (600 MHz,  $\text{CDCl}_3$ ) spectrum of compound **2**
- Figure S20. HMQC (600 MHz,  $\text{CDCl}_3$ ) spectrum of compound **2**

Table S1. <sup>1</sup>H NMR data of compound 1-2 (600 M)

| No         | 1 in CDCl <sub>3</sub>           | 1 in CD <sub>3</sub> OD         | 2 in CDCl <sub>3</sub>                |
|------------|----------------------------------|---------------------------------|---------------------------------------|
| 1 $\alpha$ | 4.31 (d, <i>J</i> = 16.0)        | 4.23 (d, <i>J</i> = 16.0)       | 4.32 (d, <i>J</i> = 16.7)             |
| 1 $\beta$  | 4.55 (d, <i>J</i> = 16.0)        | 4.42 (d, <i>J</i> = 16.0)       | 4.59 (d, <i>J</i> = 16.2)             |
| 3          | 4.07 (m)                         | 4.08 (m)                        | 4.08 (ddd, <i>J</i> = 10.1, 5.4, 5.0) |
| 4 $\alpha$ | 2.22 (dd, <i>J</i> = 18.4, 5.4)  | 2.33(m)                         | 2.23 (dd, <i>J</i> = 19.1, 5.4)       |
| 4 $\beta$  | 2.36 (m)                         | 2.33(m)                         | 2.35 (dd, <i>J</i> = 18.4, 9.4)       |
| 5 $\alpha$ | 2.60 (dd, <i>J</i> = 17.5, 6.4)  | 2.58(m)                         | 2.71 (dd, <i>J</i> = 17.6, 6.1)       |
| 5 $\beta$  | 2.41 (dd, <i>J</i> = 17.5, 10.6) | 2.58(m)                         | 2.57(m)                               |
| 6          | 5.09 (dd, <i>J</i> = 10.4, 6.4)  | 5.00 (dd, <i>J</i> = 10.1, 6.4) | 6.20 (dd, <i>J</i> = 10.5, 6.2)       |
| 9          | 5.54 (dd, <i>J</i> = 15.0, 6.1)  | 5.54 (dd, <i>J</i> = 15.4, 6.2) | 5.54 (dd, <i>J</i> = 15.4, 5.0)       |
| 10         | 5.80 (dq, <i>J</i> = 15.0, 6.9)  | 5.79 (dq, <i>J</i> = 15.4, 6.5) | 5.81 (dq, <i>J</i> = 15.4, 6.5)       |
| 11         | 1.74 (d, <i>J</i> = 6.5)         | 1.72 (d, <i>J</i> = 6.6)        | 1.74 (d, <i>J</i> = 6.5)              |
| 12         | 1.54 (s)                         | 1.49(s)                         | 1.56 (s)                              |
| 2''        | -                                | -                               | 2.07(s)                               |
| 3'         | 6.29 (d, <i>J</i> = 2.6)         | 6.29 (d, <i>J</i> = 2.6)        | 6.30 (d, <i>J</i> = 2.4)              |
| 5'         | 6.29 (d, <i>J</i> = 2.6)         | 6.34 (d, <i>J</i> = 2.6)        | 6.27 (d, <i>J</i> = 2.7)              |
| 8'         | 2.55 (s)                         | 2.55 (s)                        | 2.49 (s)                              |
| -OMe       | 3.79 (s)                         | 3.79 (s)                        | 3.78 (s)                              |
| 2'-OH      | 11.16 (s)                        | No observed                     | 11.09(s)                              |

Table S2. <sup>13</sup>C NMR data of compound 1-2 (150 M)

| No | 1 in CD <sub>3</sub> OD | 2 in CDCl <sub>3</sub> | No   | 1 in CD <sub>3</sub> OD | 2 in CDCl <sub>3</sub> |
|----|-------------------------|------------------------|------|-------------------------|------------------------|
| 1  | 64.1                    | 63.6                   | 11   | 18.0                    | 18.0                   |
| 3  | 74.8                    | 73.6                   | 12   | 16.4                    | 17.2                   |
| 4  | 37.2                    | 36.5                   | 1''  | -                       | 169.9                  |
| 4a | 153.6                   | 149.3                  | 2''  | -                       | 21.0                   |
| 5  | 38.8                    | 35.0                   | 1'   | 107.2                   | 105.4                  |
| 6  | 68.7                    | 69.7                   | 2'   | 166.2                   | 165.8                  |
| 7  | 88.2                    | 83.5                   | 3'   | 99.8                    | 99.0                   |
| 8  | 195.2                   | 191.5                  | 4'   | 165.5                   | 164.3                  |
| 8a | 130.1                   | 130.3                  | 5'   | 111.7                   | 111.5                  |
| 9  | 131.7                   | 130.3                  | 6'   | 144.6                   | 143.2                  |
| 10 | 129.3                   | 129.2                  | -OMe | 55.8                    | 55.5                   |

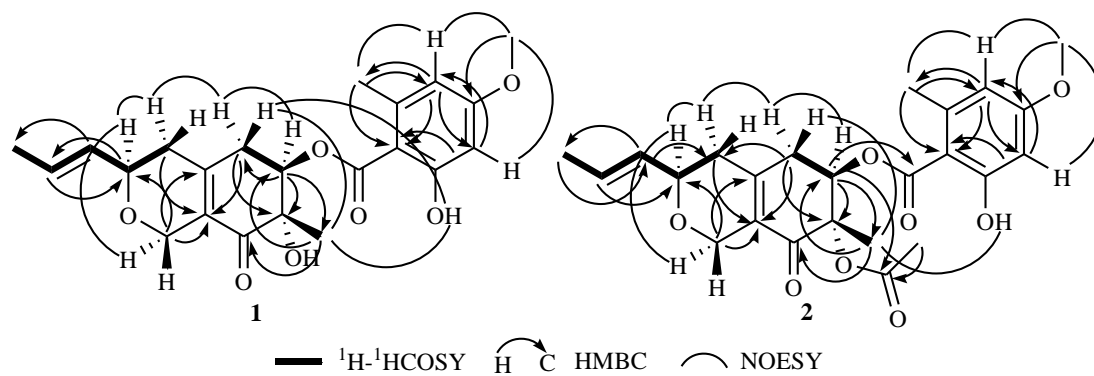

Figure S1. Key HMBC,  $^1\text{H}-^1\text{H}$  COSY and NOESY correlations of **1** and **2**

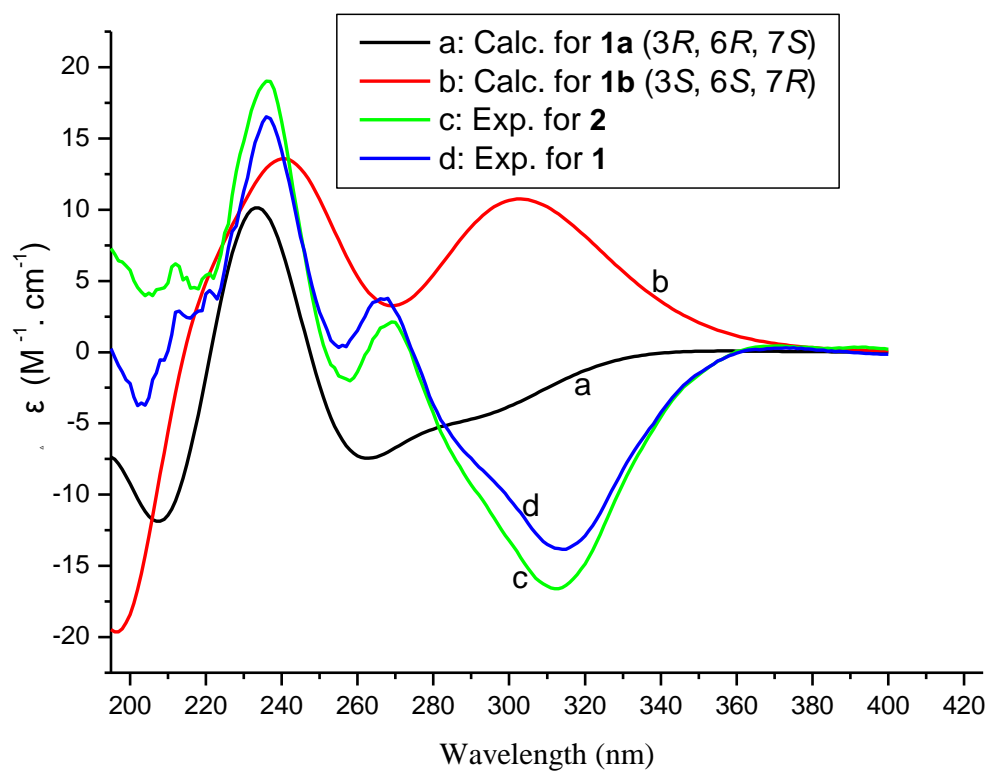

Figure S2. Calculated and experimental ECD spectra of **1** and **2**.

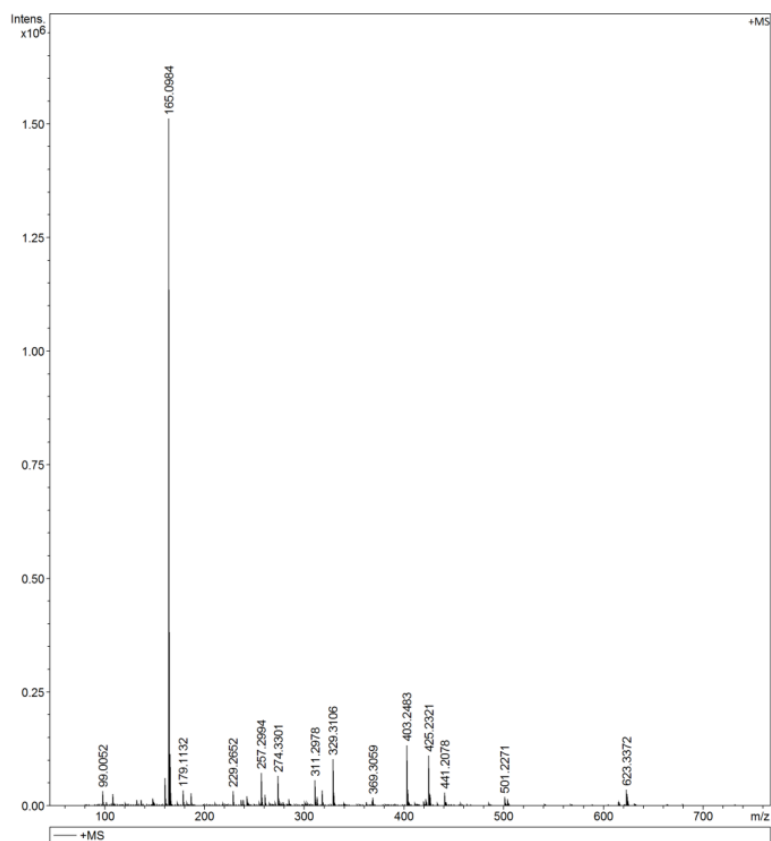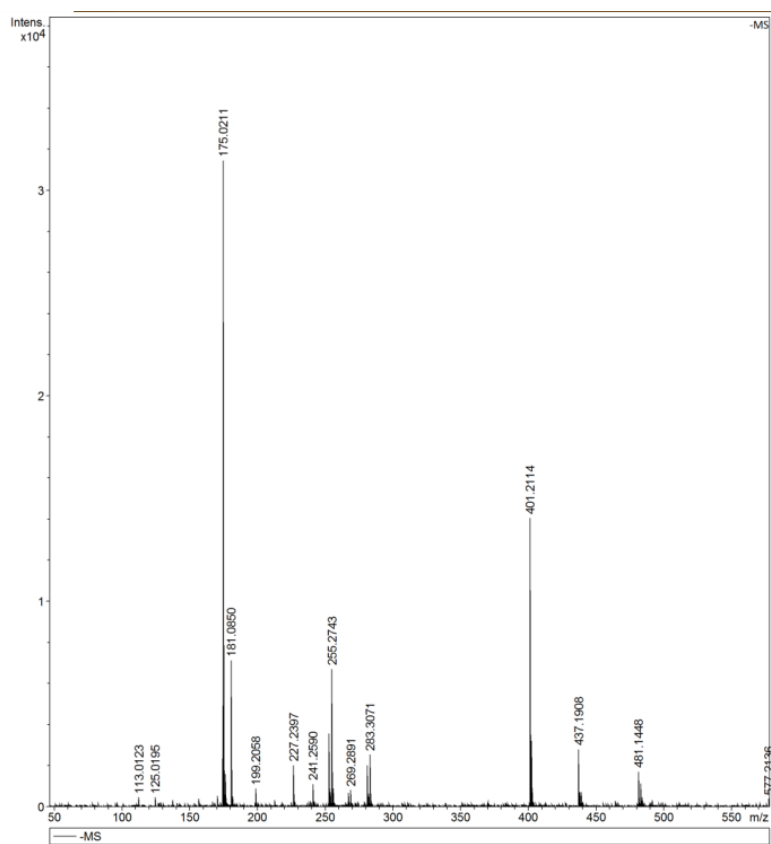

Figure S3. ESI MS spectrum of compound 1

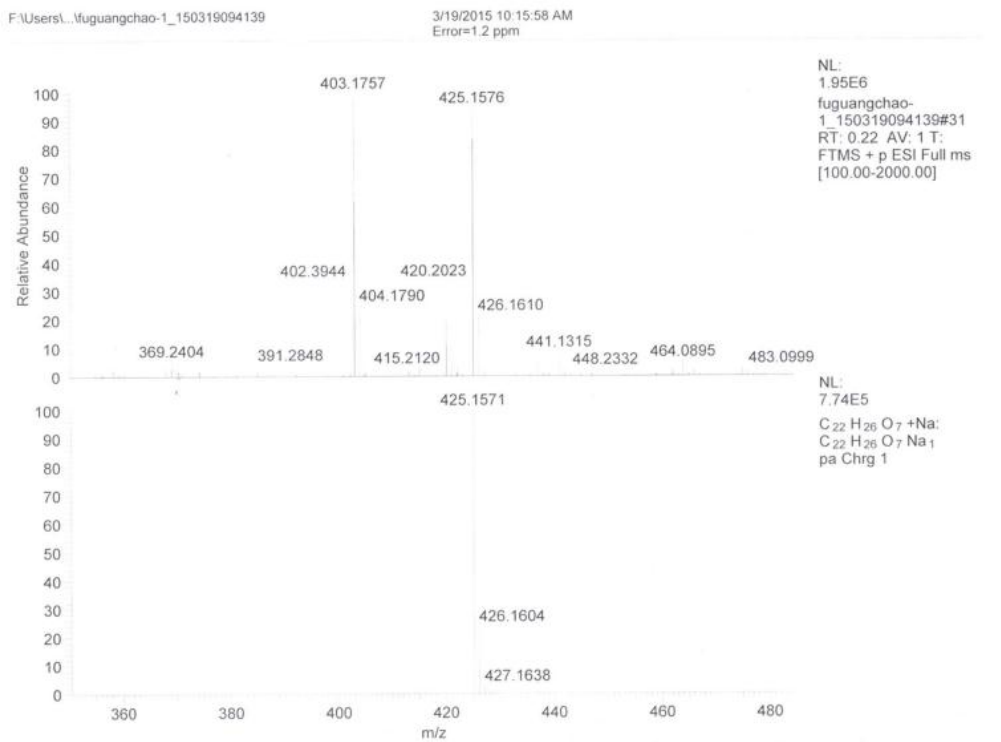

Figure S4. HRESI MS spectrum of compound **1**

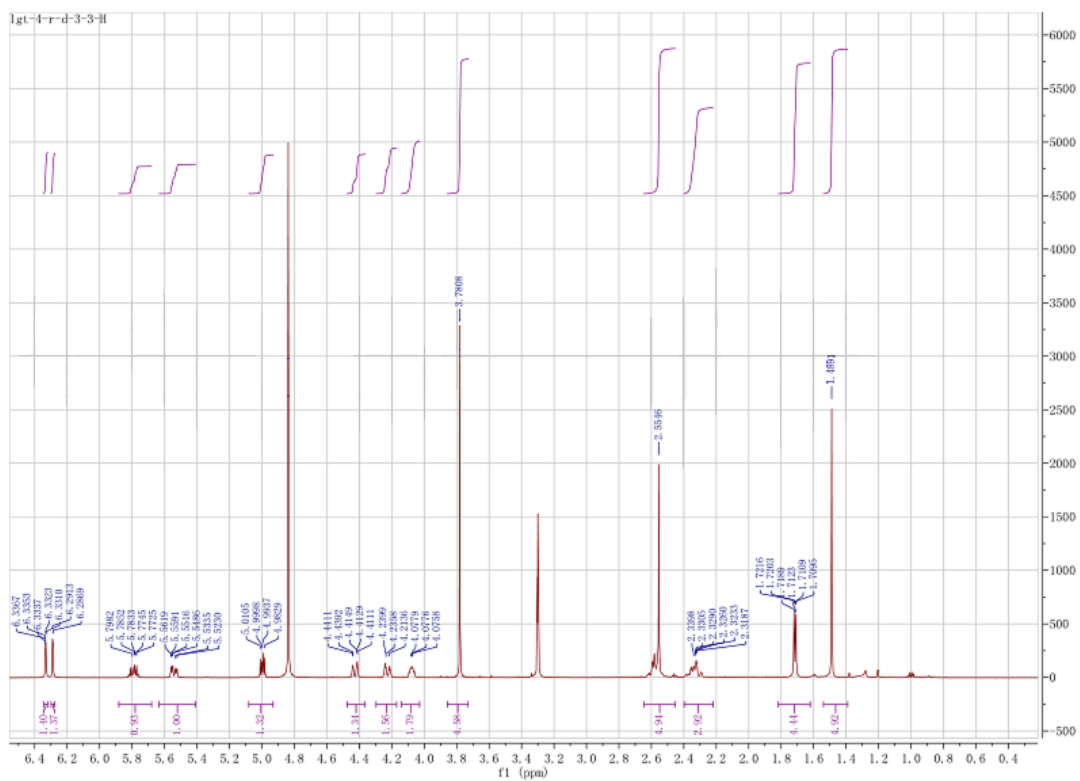

Figure S5. <sup>1</sup>H NMR (600 MHz, CD<sub>3</sub>OD) spectrum of compound **1**

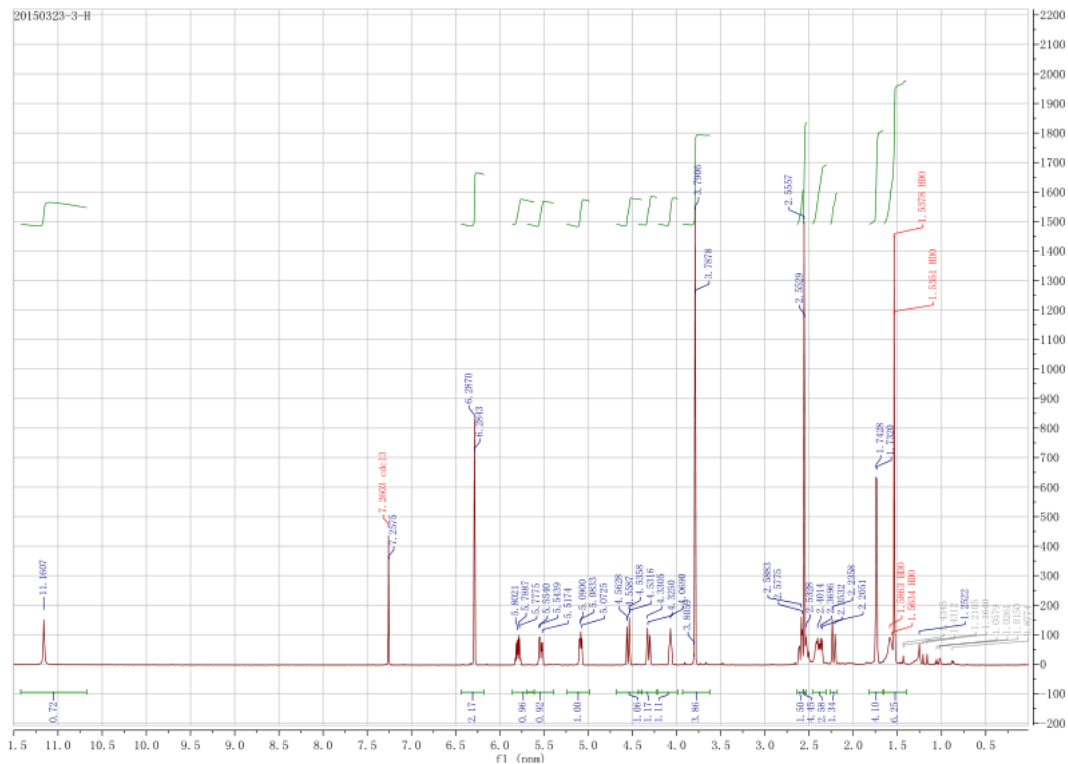

Figure S6.  $^1\text{H}$  NMR (600 MHz,  $\text{CDCl}_3$ ) spectrum of compound **1**

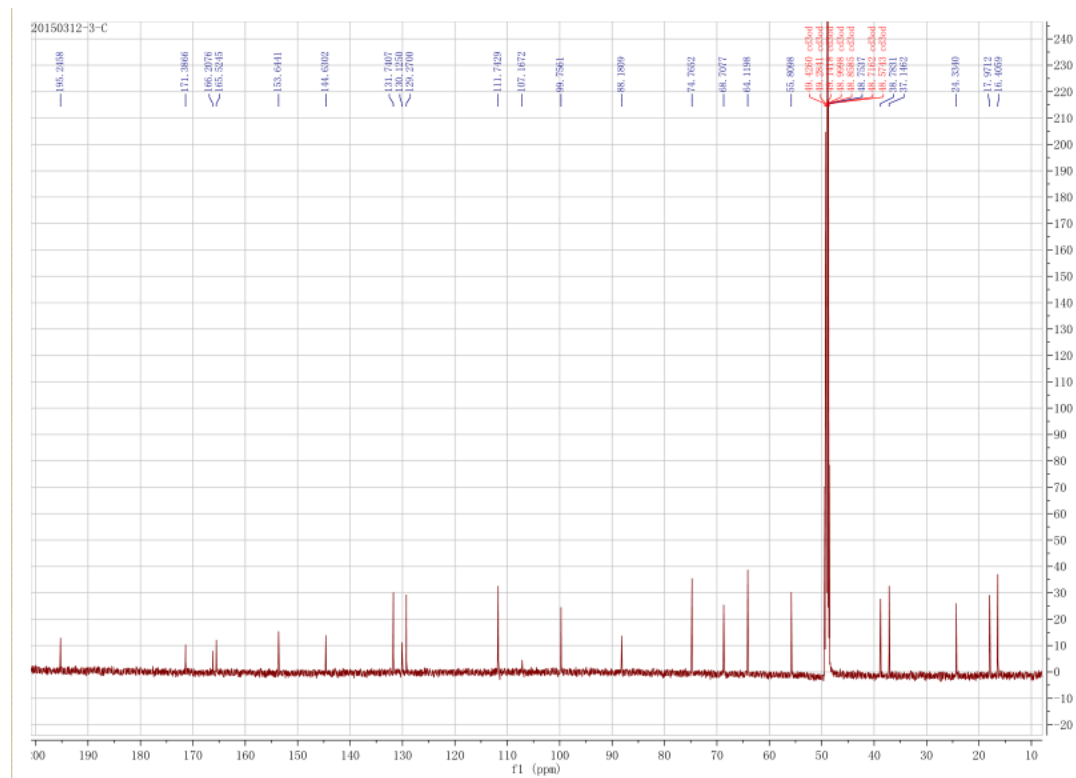

Figure S7.  $^{13}\text{C}$  NMR (600 MHz,  $\text{CD}_3\text{OD}$ ) spectrum of compound **1**

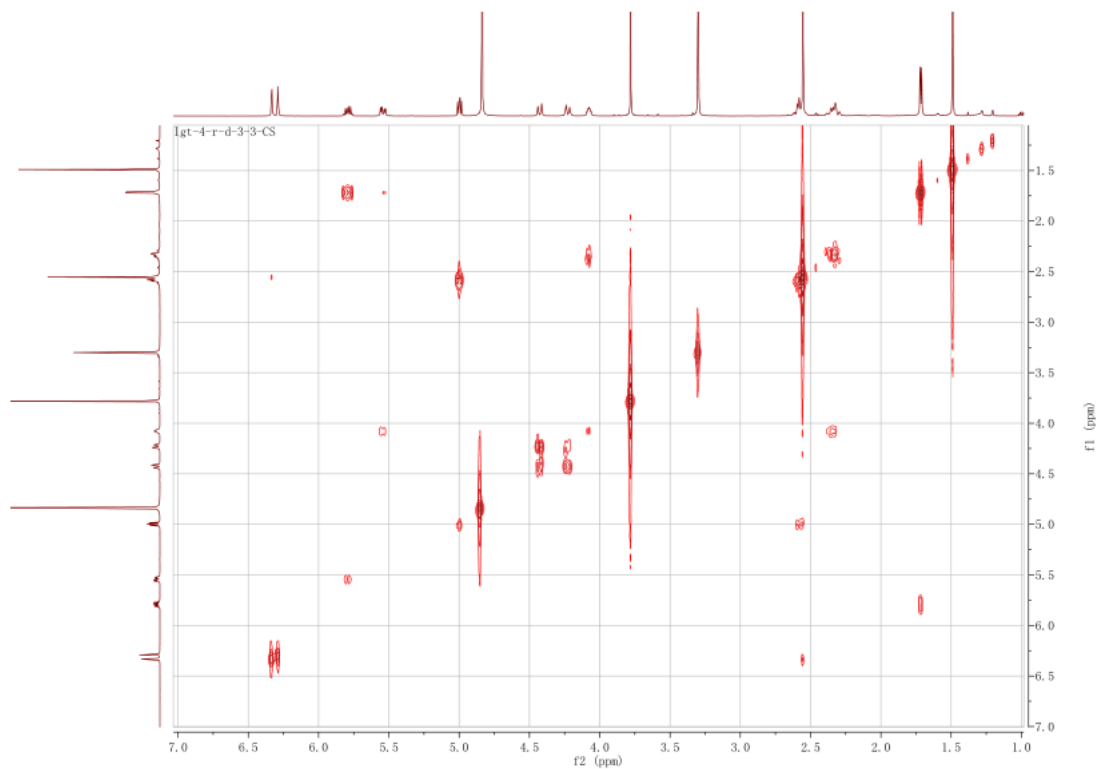

Figure S8. COSY (600 MHz, CD<sub>3</sub>OD) spectrum of compound **1**

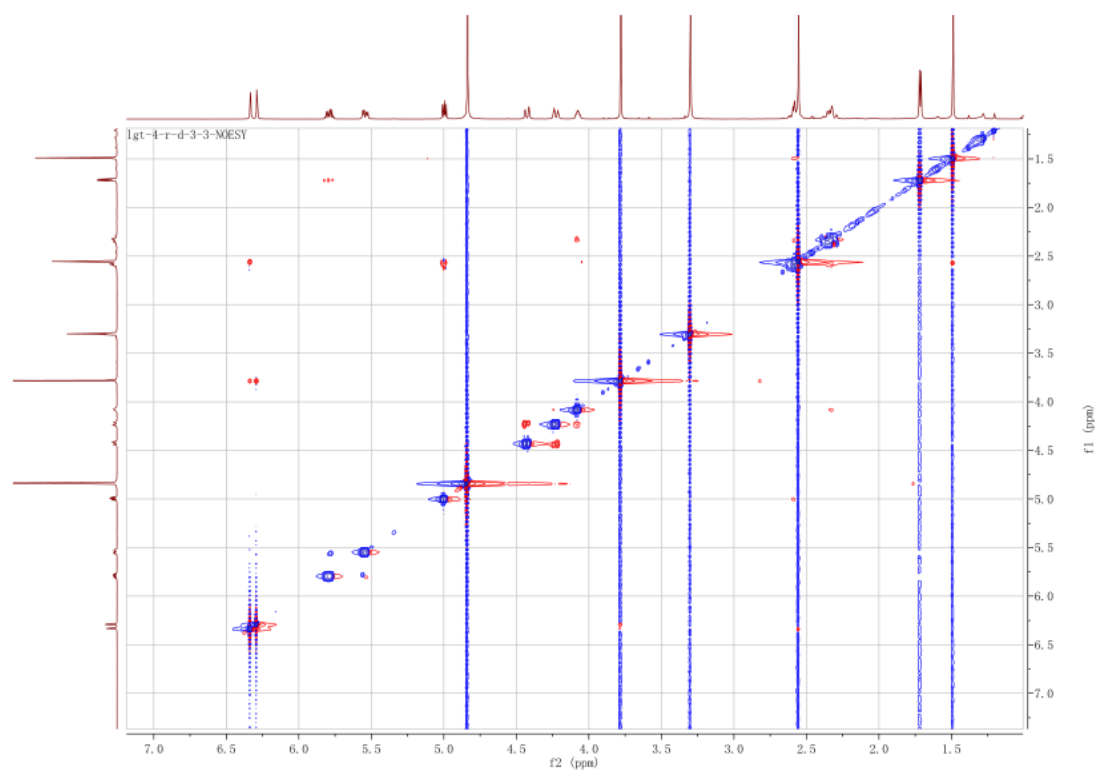

Figure S9. NOESY (600 MHz, CD<sub>3</sub>OD) spectrum of compound **1**



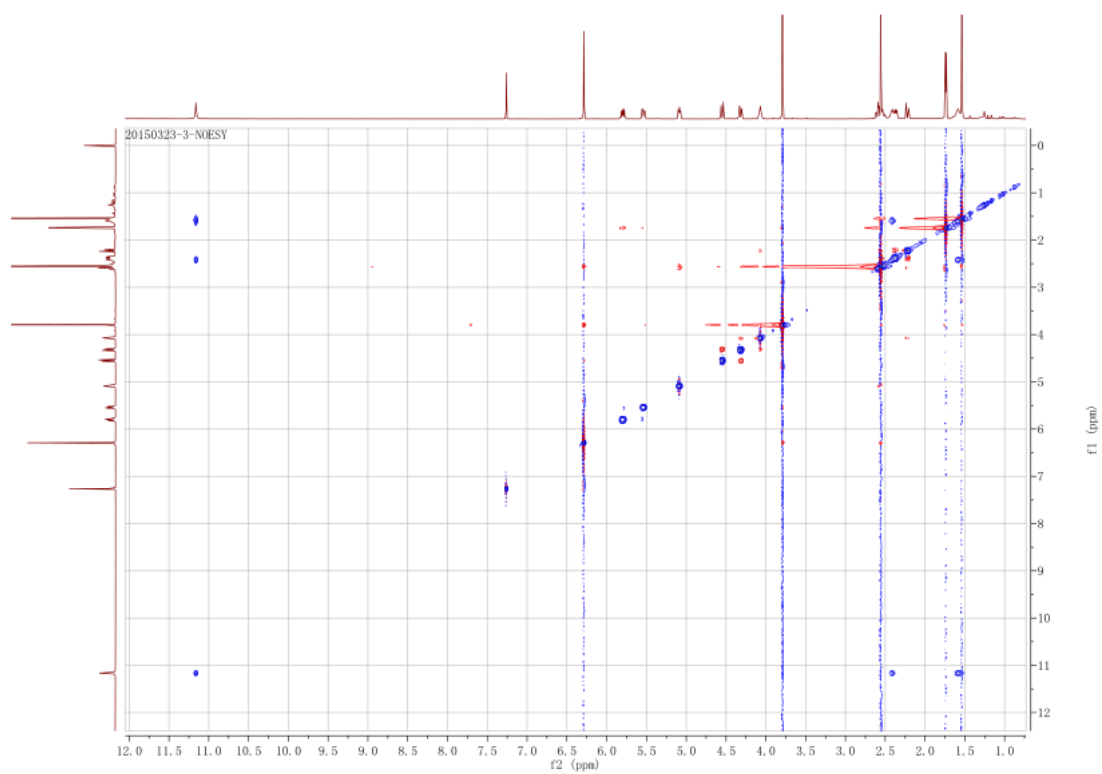

Figure S10. NOESY (600 MHz,  $\text{CDCl}_3$ ) spectrum of compound **1**

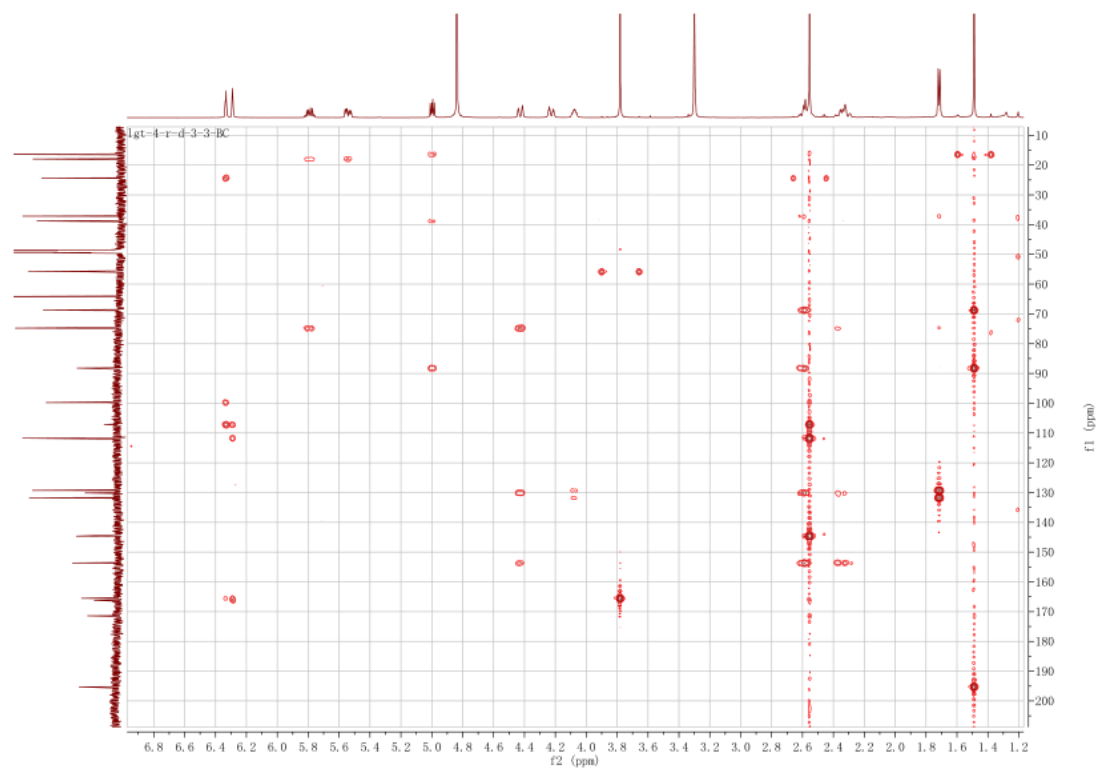

Figure S11. HMBC (600 MHz,  $\text{CD}_3\text{OD}$ ) spectrum of compound **1**

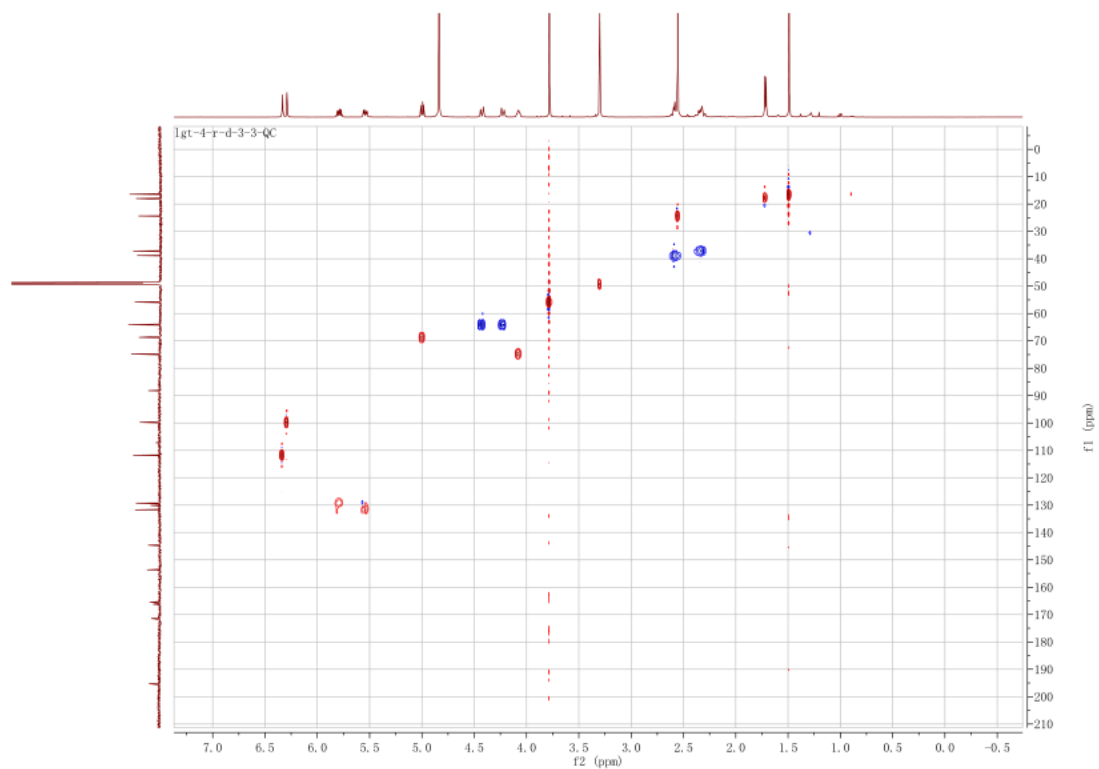

Figure S12. HMQC (600 MHz, CD<sub>3</sub>OD) spectrum of compound **1**

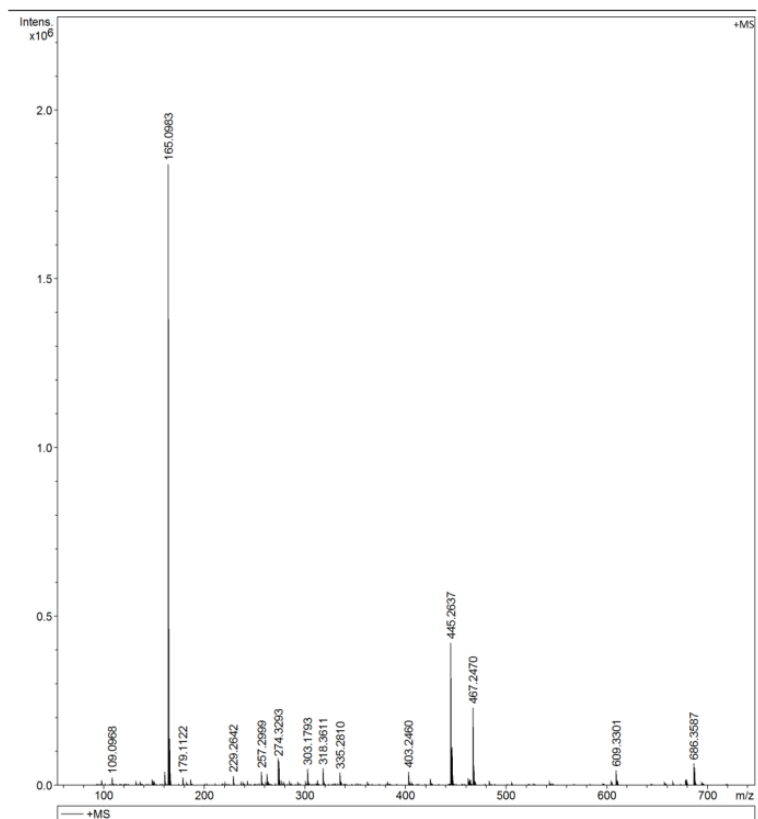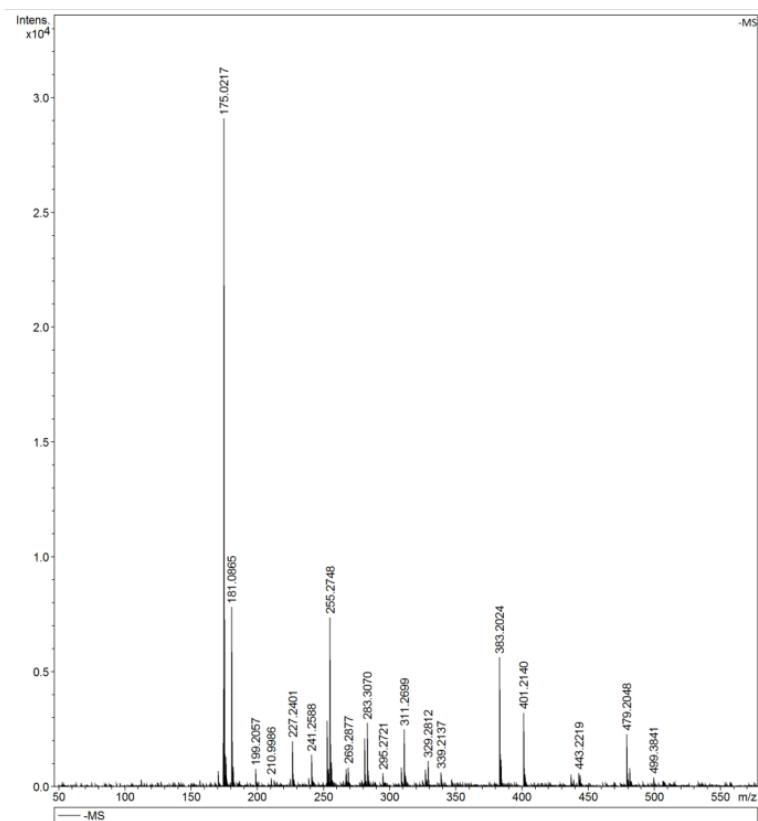

Figure S13. ESI MS spectrum of compound 2

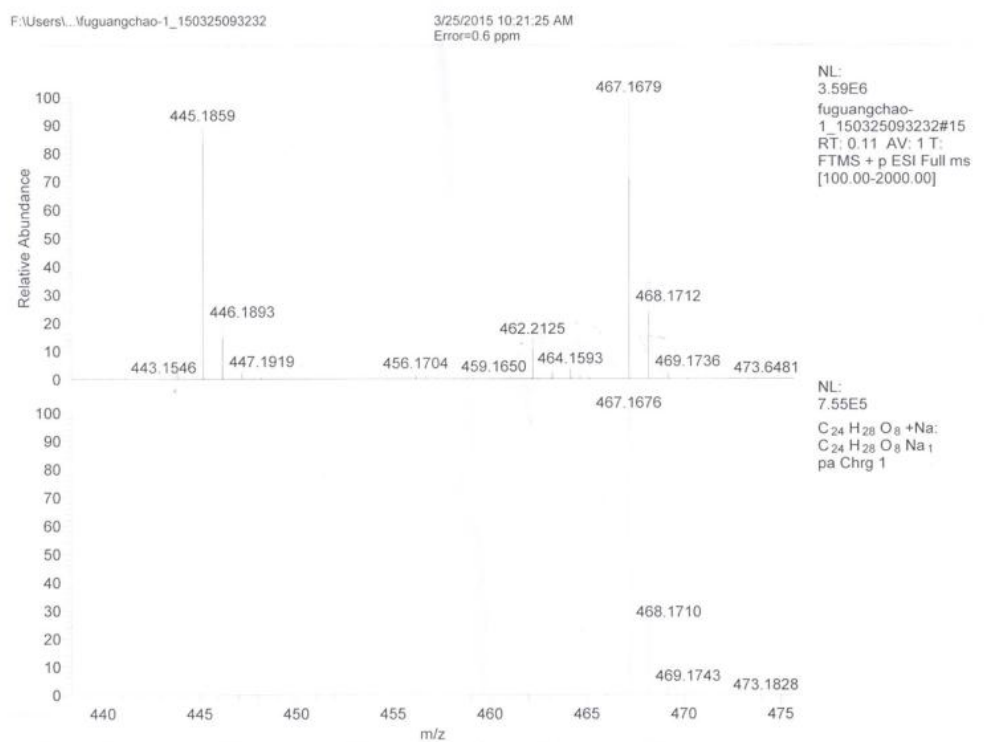

Figure S14. HRESI MS spectrum of compound **2**

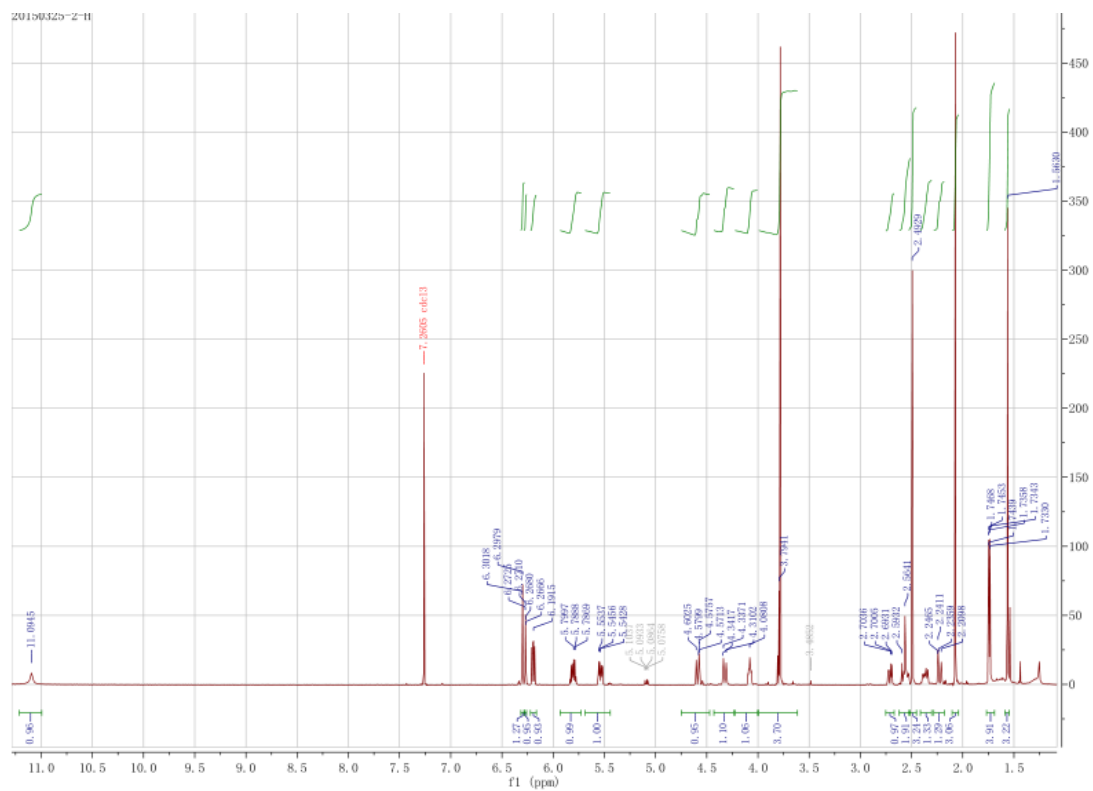

Figure S15. <sup>1</sup>H NMR (600 MHz, CDCl<sub>3</sub>) spectrum of compound **2**

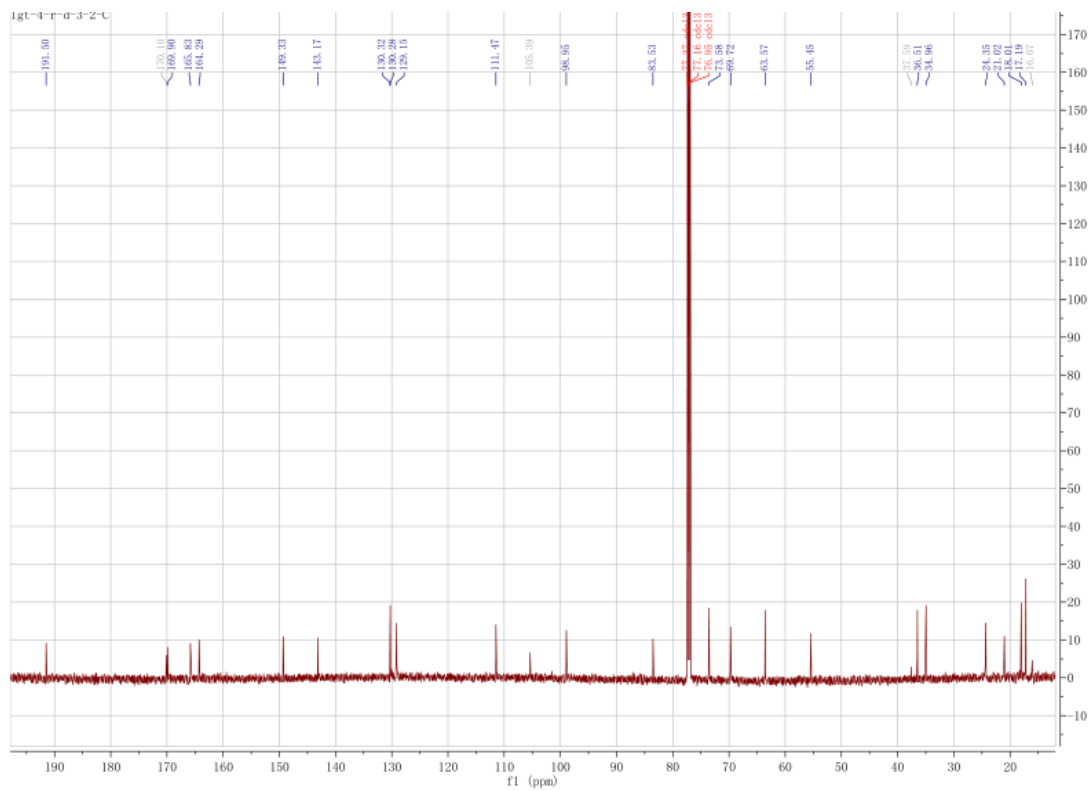

Figure S16.  $^{13}\text{C}$  NMR (600 MHz,  $\text{CDCl}_3$ ) spectrum of compound **2**

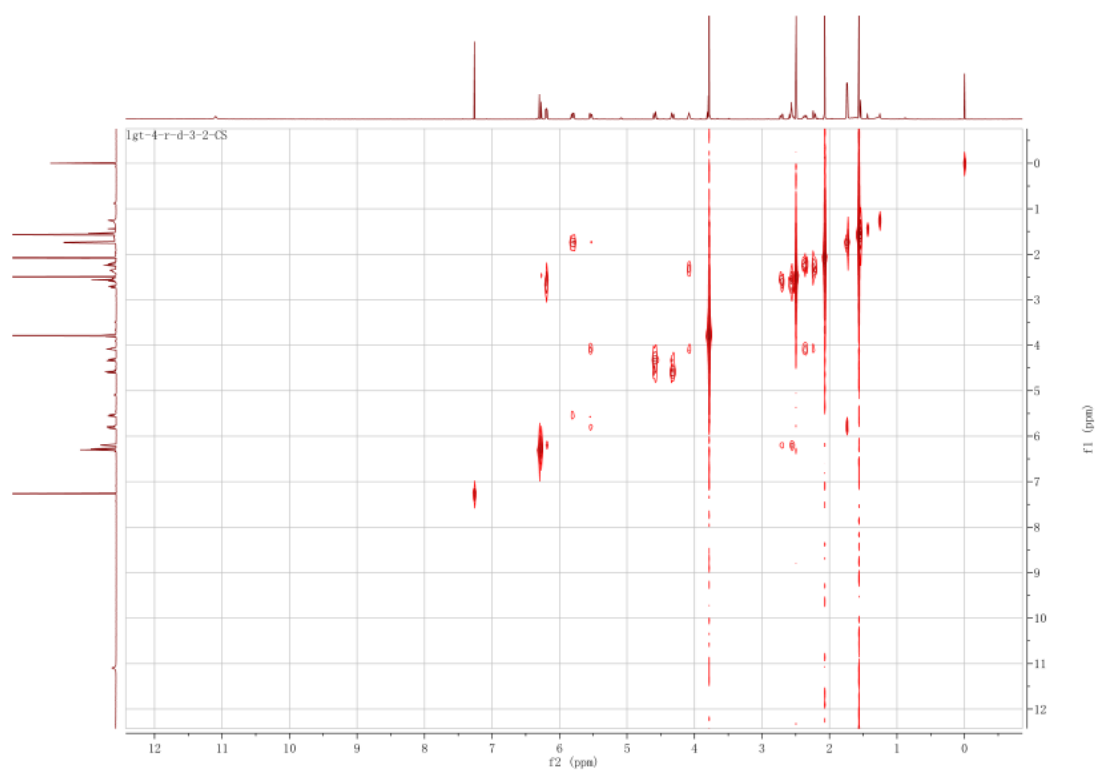

Figure S17. COSY (600 MHz,  $\text{CDCl}_3$ ) spectrum of compound **2**

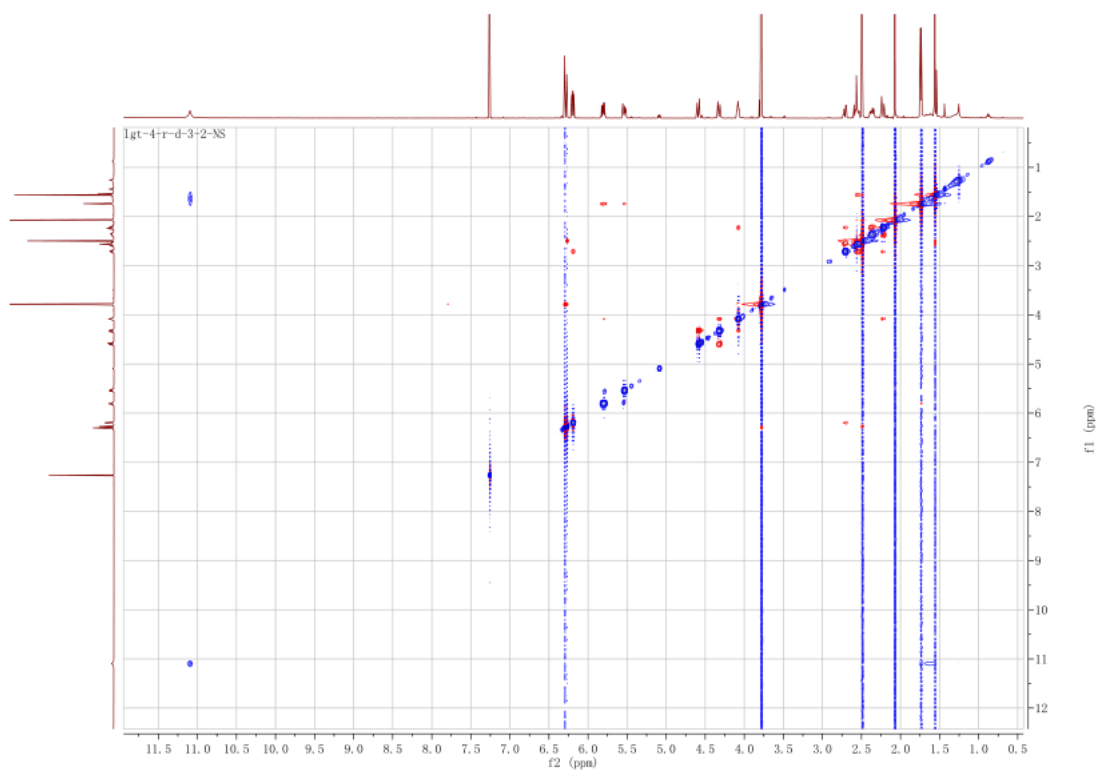

Figure S18. NOESY (600 MHz, CDCl<sub>3</sub>) spectrum of compound **2**

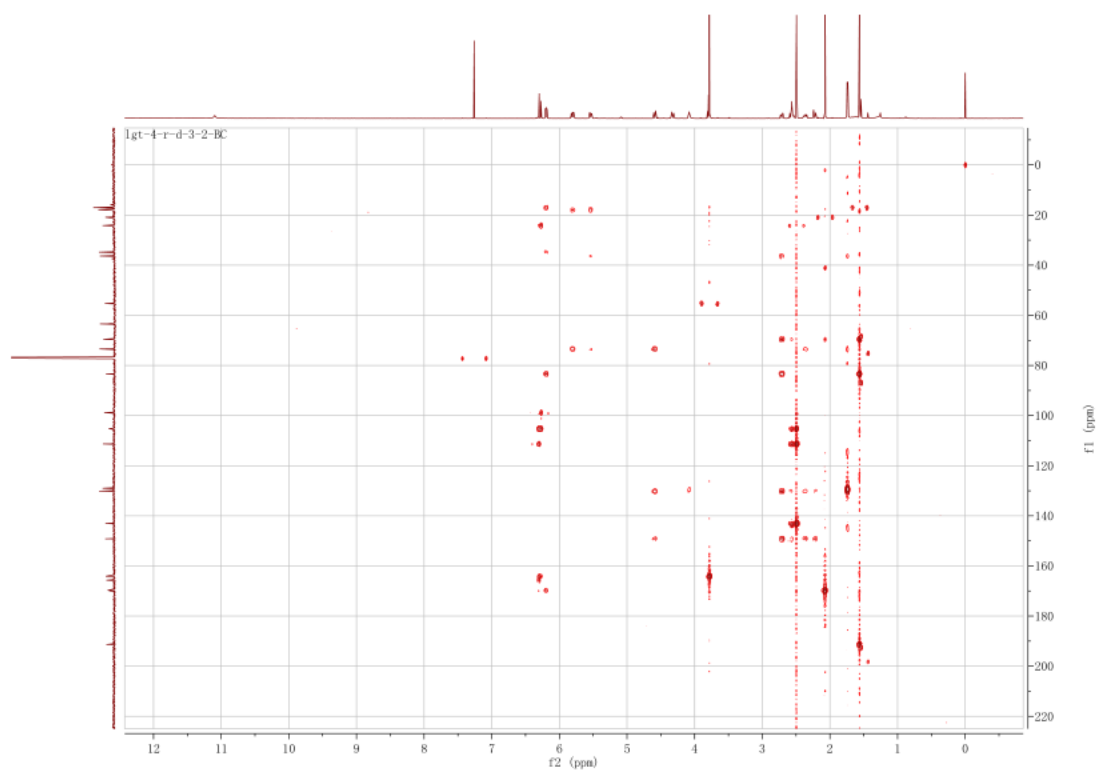

Figure S19. HMBC (600 MHz, CDCl<sub>3</sub>) spectrum of compound **2**

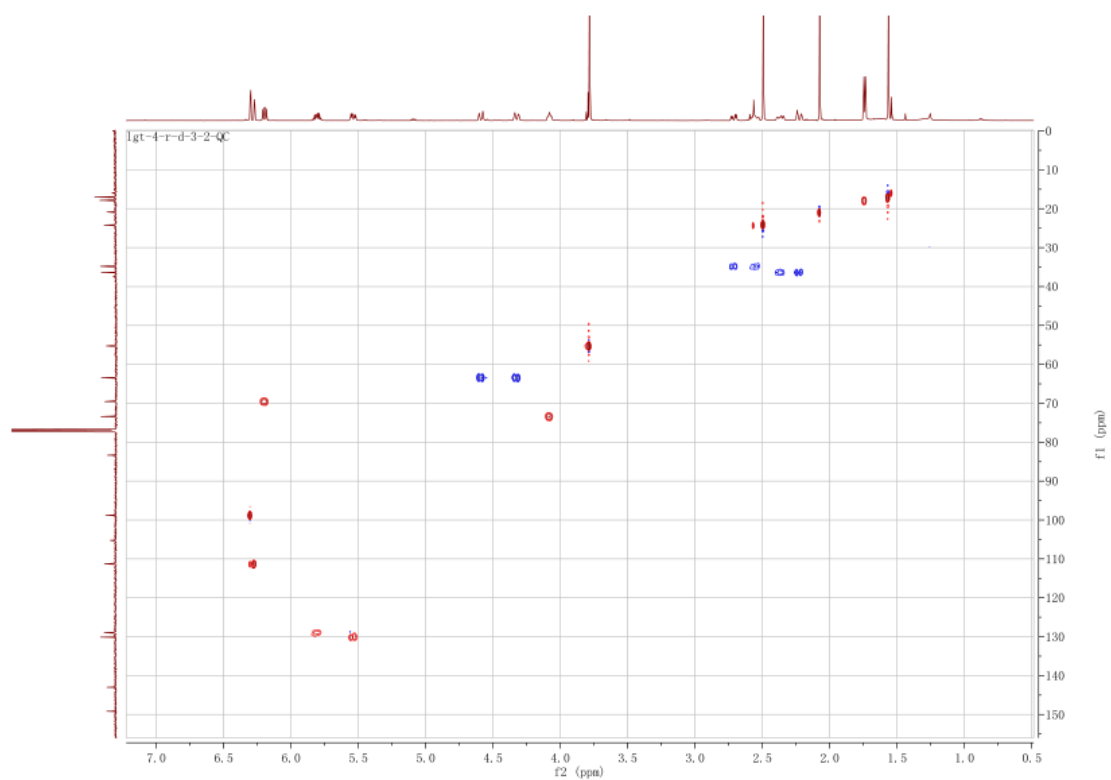

Figure S20. HMQC (600 MHz,  $\text{CDCl}_3$ ) spectrum of compound **2**
